# Supplementary material
Source: publisher figshare collection journal article supplement (https://gsajournals.figshare.com/ndownloader/files/15051620)
Supplement: Supplementary file 1 [file 15051620]

## Sheet: Table S14
Table S14. Overview of evolutionarily conserved regulated medaka genes investigated in the context of general human signaling pathways.
O V E R L A P:	Cisplatin_UP (tg)	Cisplatin_DOWN (tg)	Trametinib_UP (tg)	Trametinib_DOWN (tg)	Cisplatin_UP (wt + tg) (commonly regulated)	Cisplatin_DOWN (wt + tg) (commonly regulated)	Trametinib_UP (wt + tg) (commonly regulated)	Trametinib_DOWN (wt + tg) (commonly regulated)
KEGG_DRUG_METABOLISM_OTHER_ENZYMES		UPP2			no match	no match	no match	DPYS
RESPONSE_TO_DRUG	no match
KEGG_DRUG_METABOLISM_OTHER_ENZYMES	no match		UPP2	no match	no match	no match	no match	DPYS
GO_DRUG_METABOLIC_PROCESS	no match				no match	no match	NOS1	no match
GO_DRUG_TRANSPORT	SLC47A1, SLC47A2	no match			no match
GO_DRUG_TRANSPORTER_ACTIVITY	SLC47A1, SLC47A2	no match			SLC19A3	no match	no match	no match
KEGG_MELANOGENESIS	no match				no match
GO_MELANIN_METABOLIC_PROCESS	no match				no match
GO_MELANOCYTE_DIFFERENTIATION	no match
HALLMARK_APOPTOSIS	no match				no match	no match	ATF3, PRF1, RHOB, TIMP2, TNF	DFFA
HALLMARK_WNT_BETA_CATENIN_SIGNALING	no match
HALLMARK_INFLAMMATORY_RESPONSE	no match	no match	IL12B, PTGER4	APLNR, HPN, TLR2	no match	no match	LTA, PTAFR	no match
HALLMARK_COMPLEMENT	no match			DUSP6	no match	no match	CP, TIMP2	no match
HALLMARK_P53_PATHWAY	SLC7A11	no match	MKNK2	no match	MDM2	no match	ATF3, PMM1	no match
HALLMARK_NOTCH_SIGNALING	no match	no match	no match	STC1, SPRY4	no match
HALLMARK_IL6_JAK_STAT3_SIGNALING	no match	IRF9	REG1A	TLR2	no match	no match	IL1R2, MAP3K8, TNF	no match
HALLMARK_GLYCOLYSIS	no match	GMPPB	CHST12	PYGL, STC1	no match	no match	EGLN3, GOT1	no match
HALLMARK_FATTY_ACID_METABOLISM	no match				FABP1	no match	no match	no match
HALLMARK_G2M_CHECKPOINT	no match	CHAF1A	RACGAP1	no match	no match
HALLMARK_DNA_REPAIR	no match				no match	no match	FEN1	no match
HALLMARK_TGF_BETA_SIGNALING	no match
HALLMARK_TNFA_SIGNALING_VIA_NFK	no match	no match	CD80, IL12B, PLAU, PTGER4	DUSP4, NR4A1, TLR2	no match	no match	ATF3, MAP3K8, RHOB, SLC2A6, TNF, TNIP2	EGR2
